# Supplementary material for: Mindfulness and Cardiometabolic Health During Pregnancy: An Integrative Review
Source: Springer Nature journal article supplement (doi:10.1007/s12671-024-02337-2), 2024-03-28
Supplement: MOESM1 [file 26905210]

**Article Title:** Mindfulness and cardiometabolic health during pregnancy: An integrative review

**Journal:** Mindfulness

**Authors:** Karen L. Lindsay\*, Yuqing Guo, Lauren E. Gyllenhammer

**\*Corresponding author affiliation:** School of Medicine, Department of Pediatrics, University of California, Irvine. [klindsa@hs.uci.edu](mailto:klindsa@hs.uci.edu)

### **Literature Search Strategy**

("Pregnancy"[Mesh] OR pregnan\* OR "Prenatal Care"[Mesh] OR prenatal OR antenatal OR maternal) AND ("Mindfulness"[Mesh] OR mindful\*) AND ("Gestational Weight Gain"[Mesh] OR "weight gain" OR "Blood Glucose"[Mesh] OR glucose OR "Glycemic Control"[Mesh] OR glycemia OR HbA1c OR "Hb A1c" OR "Insulin"[Mesh] OR insulin OR pregnancy-induced diabetes OR "Diabetes, Gestational"[Mesh] OR gestational diabetes OR "beta-cell function" OR "beta-cell dysfunction" OR hypertension OR "Hypertension, Pregnancy-Induced"[Mesh] OR pregnancy induced hypertension OR gestational hypertension OR pregnancy transient hypertension OR preeclampsia OR "Pre-Eclampsia"[Mesh] OR "pre eclampsia" OR "pregnancy toxemia\*" OR "blood pressure" OR "Blood Pressure"[Mesh] OR inflammat\* OR "Inflammation"[Mesh] OR cytokine OR "Cytokines"[Mesh] OR interleukin)

Filters: English
