# Supplementary material for: Mindfulness and Cardiometabolic Health During Pregnancy: An Integrative Review
Source: Springer Nature journal article supplement (doi:10.1007/s12671-024-02337-2), 2024-03-28
Supplement: MOESM3 [file 26905210]

**Article Title:** Mindfulness and cardiometabolic health during pregnancy: An integrative review

**Journal:** Mindfulness

**Authors:** Karen L. Lindsay\*, Yuqing Guo, Lauren E. Gyllenhammer

**\*Corresponding author affiliation:** School of Medicine, Department of Pediatrics, University of California, Irvine. [klindsa@hs.uci.edu](mailto:klindsa@hs.uci.edu)

**Table S2: Characteristics of included quantitative studies**

| <i>Intervention studies</i> |                      |          |                                                                                                                                                                             |                                                                                                                                                                                                                                                                                                                                                                                                                                      |                                                             |
|-----------------------------|----------------------|----------|-----------------------------------------------------------------------------------------------------------------------------------------------------------------------------|--------------------------------------------------------------------------------------------------------------------------------------------------------------------------------------------------------------------------------------------------------------------------------------------------------------------------------------------------------------------------------------------------------------------------------------|-------------------------------------------------------------|
| Author, year                | Study design         | Location | Population                                                                                                                                                                  | Intervention (I)/control (C)                                                                                                                                                                                                                                                                                                                                                                                                         | Cardiometabolic Outcome(s)                                  |
| Bublitz et al., 2023        | RCT; 2 parallel arms | USA      | N=29, singleton pregnancy, age $\geq 18$ y, with a history of hypertensive disorder, absence of severe depressive symptoms; enrolled at $\leq 20$ weeks                     | I: Eight weekly 30-minute mindfulness training sessions delivered by phone, emphasizing awareness of breath and body scan techniques from the standard MBSR curriculum. Home practice of these techniques also prescribed.<br>C: Standard prenatal medical care including medical treatment of hypertension as needed; weekly phone call check-ins asking how they were feeling and attendance at routine prenatal care appointments | Hypertensive disorders of pregnancy; blood pressure         |
| Crovetto et al., 2021       | RCT; 3 parallel arms | Spain    | N=1221, singleton pregnancy, age $\geq 18$ y, at high risk for delivering a small-for-gestational age baby; enrolled at 19-23 weeks                                         | I: Monthly dietitian consults on the Mediterranean diet and free provision of olive oil and walnuts<br>I: Eight-week standardized MBSR program, home practices strongly encouraged during and after the course, additional mindfulness/yoga sessions available after course completion.<br>C: Standard prenatal medical care                                                                                                         | Preeclampsia, GDM, gestational hypertension, blood pressure |
| Epel et al., 2019           | Quasi-experimental   | USA      | N=215, singleton pregnancy, low-income, pregravid BMI 25-40, age 18-45y, no diabetes; enrolled between 12-19 weeks (Intervention group), and up to 23 weeks (control group) | I: Mindful Moms Training (MMT): 8 weekly 2-hr group classes plus 2 telephone sessions beginning in early 2 <sup>nd</sup> trimester. Classes included didactic and experiential components, covering mindfulness based stress reduction, mindful eating and healthy nutrition advice as well as prescribed homework on these activities.                                                                                              | GWG and rate of excess GWG; glucose tolerance               |

|                               |                      |           |                                                                                                                                                                               |                                                                                                                                                                                                                                                                                                                                                                                                                                                                                                                                                                                                                        |                                                                                                            |
|-------------------------------|----------------------|-----------|-------------------------------------------------------------------------------------------------------------------------------------------------------------------------------|------------------------------------------------------------------------------------------------------------------------------------------------------------------------------------------------------------------------------------------------------------------------------------------------------------------------------------------------------------------------------------------------------------------------------------------------------------------------------------------------------------------------------------------------------------------------------------------------------------------------|------------------------------------------------------------------------------------------------------------|
|                               |                      |           |                                                                                                                                                                               | C: Convenience sample receiving standard prenatal medical care                                                                                                                                                                                                                                                                                                                                                                                                                                                                                                                                                         |                                                                                                            |
| Muthukrishnan et al., 2016    | RCT; 2 parallel arms | India     | N=74, singleton pregnancy without complications (including obesity or psychiatric problems), age ≥18y; enrolled at 12 weeks                                                   | I: Five week mindful meditation program adapted from MBSR; 2 sessions per week plus 30 mins daily home practice.<br>C: Standard prenatal medical care                                                                                                                                                                                                                                                                                                                                                                                                                                                                  | Blood pressure at rest and blood pressure increase in response to cold pressor and mental arithmetic tests |
| Opie et al., 2018             | Quasi-experimental   | Australia | N=217, singleton pregnancy, BMI 30-35, age ≥18y, uncomplicated pregnancy; enrolled at >20 weeks                                                                               | I: One dietitian consult focused on healthy eating and achieving adequate GWG, plus monthly follow-up calls to review and support achievement of personalized nutrition goals; mindfulness approaches to eating were incorporated into dietary consults in a non-standardized manner.<br>C: Convenience sample receiving standard prenatal medical care                                                                                                                                                                                                                                                                | GDM, GWG                                                                                                   |
| Redman et al., 2017           | RCT; 3 parallel arms | USA       | N=54, singleton pregnancy, pregravid BMI ≥25, no diabetes, no history or current episode of major depression or psychotic disorder, aged 18-40y; enrolled at 13 weeks         | I: SmartMoms: 18 lessons on diet and behavior modification strategies from 13 weeks gestation until delivery, delivered as a combination of group and individualized sessions. Intervention group randomized to receive the intervention either in-person or remotely through smartphone application plus contact through email, phone calls and text messages, with identical content. Mindfulness stress reduction and mindful eating guidance included during 2 group and 2 individual sessions, remaining sessions counselled on diet, physical activity, and monitoring GWG.<br>C: Standard prenatal medical care | GWG and rate of excess GWG                                                                                 |
| Youngwanichsetha et al., 2014 | RCT; 2 parallel arms | Thailand  | N=170 pregnant individuals with GDM, fasting and postprandial blood glucose <105 and <120 mg/dl respectively, not receiving insulin therapy, no other pregnancy complications | I: Mindful eating and yoga: two 50min training sessions using videos and practice manuals, followed by 8 weeks of at-home practice for 5 days/week. Yoga comprised of a 15-20min practice of 9 pregnancy-modified postures repeated 10 times. Mindful eating comprised of setting blood glucose goals, modifying carbohydrate portion and selecting low GI foods,                                                                                                                                                                                                                                                      | Fasting and postprandial glucose concentrations; HbA1c                                                     |

|                                                                                                                                                                    |                              |                 | (e.g. hypertension, preeclampsia, preterm labor), mean age 32y, multiple pregnancy eligibility not defined; enrolled 24-30 weeks                                                 | awareness while eating and eating slowly for 35-40mins.<br>C: standard prenatal care for women with GDM                                                                                                         |                                                                                                                                     |
|--------------------------------------------------------------------------------------------------------------------------------------------------------------------|------------------------------|-----------------|----------------------------------------------------------------------------------------------------------------------------------------------------------------------------------|-----------------------------------------------------------------------------------------------------------------------------------------------------------------------------------------------------------------|-------------------------------------------------------------------------------------------------------------------------------------|
| <b>Observational studies</b>                                                                                                                                       |                              |                 |                                                                                                                                                                                  |                                                                                                                                                                                                                 |                                                                                                                                     |
| <b>Author, year</b>                                                                                                                                                | <b>Study design</b>          | <b>Location</b> | <b>Population</b>                                                                                                                                                                | <b>Mindfulness-related Exposure</b>                                                                                                                                                                             | <b>Cardiometabolic Outcome(s)</b>                                                                                                   |
| Braeken et al., 2017                                                                                                                                               | Prospective cohort           | Netherlands     | N=156, low-risk pregnancies, mean pregravid BMI=24; enrolled at 8-14 weeks                                                                                                       | Maternal trait mindfulness, assessed by the Freiberg Mindfulness Inventory short form (14 item)                                                                                                                 | Systolic and diastolic blood pressure measured in the first and third trimester                                                     |
| Headen et al., 2019                                                                                                                                                | Retrospective, observational | USA             | N=207, singleton pregnancy, low-income, pregravid BMI 25-40, age 18-45y, no diabetes; enrolled between 12-23 weeks                                                               | Mindful Moms Training as described under the intervention study by Epel et al. This study evaluated the moderating effects of participant neighborhood typology on the efficacy of the mindfulness intervention | Rate of excess GWG; glucose tolerance                                                                                               |
| Lindsay et al., 2021                                                                                                                                               | Prospective cohort           | USA             | N=46, singleton pregnancy, age 18-40y, pregravid BMI $\geq$ 30, without pre-existing conditions such as hypertension, diabetes or psychological disorders; enrolled at <15 weeks | Mindful eating assessed by the Mindful Eating Questionnaire in early and late pregnancy; mean pregnancy total score and subscale scores were used in the analysis                                               | Rate of GWG/week, rate of adiposity gain/week, homeostasis model assessment of insulin resistance measured at 35-37 weeks gestation |
| Matthews et al., 2018                                                                                                                                              | Cross-sectional survey       | USA             | N=1073 pregnant people, age $\geq$ 18y,                                                                                                                                          | Maternal trait mindfulness, assessed by the Mindful Attention and Awareness Scale (15 item)                                                                                                                     | GWG in each trimester                                                                                                               |
| Mennitto et al., 2021                                                                                                                                              | Cross-sectional              | Canada          | N=510, singleton pregnancy, age $\geq$ 18y; enrolled at <20 weeks                                                                                                                | Maternal trait mindfulness, assessed by the Mindful Attention and Awareness Scale (15 item) in the first or early second trimester                                                                              | Maternal self-reported diagnosis of GDM or high blood pressure in pregnancy                                                         |
| BMI, body mass index; GDM, gestational diabetes mellitus; GWG, gestational weight gain; MBSR, mindfulness-based stress reduction; RCT, randomized controlled trial |                              |                 |                                                                                                                                                                                  |                                                                                                                                                                                                                 |                                                                                                                                     |
